# Supplementary material for: Pseudomonas aeruginosa C-Terminal Processing Protease CtpA Assembles into a Hexameric Structure That Requires Activation by a Spiral-Shaped Lipoprotein-Binding Partner
Source: PubMed Central journal article supplement (PMC8764530; doi:10.1128/mbio.03680-21), 2022-01-18
Supplement: mbio.03680-21-st002.pdf [file mbio.03680-21-st002.pdf]

|                                                     | CtpA $\Delta$ N37_Se      | CtpA( $\Delta$ N37, S302A) | LbcA $\Delta$ N48_Se      |
|-----------------------------------------------------|---------------------------|----------------------------|---------------------------|
| <b>Data collection</b>                              |                           |                            |                           |
| Wavelength (Å)                                      | 0.97931                   | 1.07803                    | 0.97872                   |
| Space group                                         | R 3                       | R 3                        | P 32 2 1                  |
| Cell dimensions                                     |                           |                            |                           |
| <i>a</i> , <i>b</i> , <i>c</i> (Å)                  | 187.49, 187.49,<br>132.01 | 189.65, 189.65,<br>131.10  | 120.70, 120.70,<br>221.94 |
| $\alpha$ , $\beta$ , $\gamma$ (°)                   | 90.00, 90.00, 120.00      | 90.00, 90.00, 120.00       | 90.00, 90.00, 120.00      |
| Resolution (Å)                                      | 93.75-3.3(3.48-3.3)*      | 94.82-3.2(3.37-3.2)*       | 94.57-3.5(3.69-3.5)*      |
| <i>R</i> <sub>merge</sub> (%)                       | 16.7 (91.2)               | 8.9 (142)                  | 18.3 (226)                |
| <i>I</i> / $\sigma$ <i>I</i>                        | 10.8 (2.9)                | 15.6 (2.0)                 | 13.2 (2.0)                |
| Total reflections                                   | 301,572 (44,008)          | 297,808 (44,906)           | 536,619 (78,420)          |
| Completeness (%)                                    | 100 (100)                 | 99.6 (99.9)                | 100 (100)                 |
| Redundancy                                          | 11.6 (11.4)               | 10.3 (10.6)                | 22.1 (22.5)               |
| Wilson B-factor                                     | 91.13                     | 113.98                     | 137.72                    |
| <b>Refinement</b>                                   |                           |                            |                           |
| Resolution (Å)                                      | 39.83 – 3.30              | 43.03 – 3.2                | 60.39 – 3.50              |
| No. reflections                                     | 26,026                    | 28,849                     | 24,277                    |
| <i>R</i> <sub>work</sub> / <i>R</i> <sub>free</sub> | 0.2375 / 0.2636           | 0.2422/0.2654              | 0.2470 / 0.2806           |
| No. of non-hydrogen atoms                           | 3933                      | 3931                       | 8352                      |
| Macromolecule                                       | 3933                      | 3931                       | 8352                      |
| Ligand                                              | 0                         | 0                          | 0                         |
| Water                                               | 0                         | 0                          | 0                         |
| <i>B</i> -factors                                   | 91.58                     | 126.34                     | 135.73                    |
| Macromolecule                                       | 91.58                     | 126.34                     | 135.73                    |
| Ligand                                              |                           |                            |                           |
| Water                                               |                           |                            |                           |
| R.m.s. deviations                                   |                           |                            |                           |
| Bond lengths (Å)                                    | 0.003                     | 0.003                      | 0.003                     |
| Bond angles (°)                                     | 0.757                     | 0.739                      | 0.608                     |
| <b>Ramachandran statistics (%)</b>                  |                           |                            |                           |
| Favored                                             | 96.83                     | 97.02                      | 97.89                     |
| Allowed                                             | 3.17                      | 2.98                       | 2.11                      |
| Outliers                                            | 0                         | 0                          | 0                         |

\*Values in parentheses are for the last (highest) resolution shell.
